# Supplementary material
Source: HighWire-hosted journal article supplement (https://ard.bmj.com/content/77/3/405)
Supplement: inline-supplementary-material-1 [file inline-supplementary-material-1.docx]

| **Countries** | **HDI rank**  Source: UNDP  2013 | **GDP**  (per capita adjusted to PPP, in international dollars)  Source: IMF 2013 | **Health expenditure**  (per capita adjusted to PPP, in international dollars)  Source: World Bank 2013 | **GINI**    Source: UNDP & World Bank, most recent year |
| --- | --- | --- | --- | --- |
| Argentina | Very high | 22,404.259 | 1,174 | 42.3 |
| Belgium | Very high | 42,077.983 | 4,264 | 27.6 |
| Canada | Very high | 43,589.570 | 4,623 | 33.7 |
| China (PRC) | High | 11,885.819 | 654 | 42.2 |
| Colombia | High | 12,806.449 | 870 | 53.5 |
| Egypt | Medium | 10,741.706 | 567 | 30.8 |
| France | Very high | 39,818.198 | 4,370 | 33.1 |
| Germany | Very high | 44,696.966 | 4,837 | 30.1 |
| Italy | Very high | 35,284.472 | 3,257 | 35.2 |
| Japan | Very high | 36,793.194 | 3,713 | 32.1 |
| Mexico | High | 17,449.050 | 1,070 | 48.1 |
| Morocco | Medium | 7,356.326 | 429 | 40.7 |
| Netherlands | Very high | 46,434.515 | 5,170 | 28.0 |
| Portugal | Very high | 26,188.302 | 2,634 | 36.0 |
| Russia | High | 24,297.963 | 1,777 | 41.6 |
| Singapore | Very high | 80,295.174 | 3,631 | missing |
| South Korea | Very high | 33,791.471 | 2,380 | 31.3 |
| Spain | Very high | 32,680.936 | 2,928 | 35.9 |
| Taiwan (ROC)# | missing | 43,677.962 | missing | missing |
| Turkey | High | 18,993.702 | 1,007 | 40.2 |
| UK | Very high | 38,224.942 | 3,374 | 32.6 |
| USA | Very high | 52,939.101 | 8,988 | 41.1 |

**Supplementary Table 1.** Socio-economic variables across each of the COMOSPA countries.

*HDI= Human Development Index; PPP=Purchasing Power Parity; UNDP= United Nations Development Programme; IMF=International Monetary Fund.*
